# Supplementary material for: Development and Evaluation of an Open-Source Software Package “CGITA” for Quantifying Tumor Heterogeneity with Molecular Images
Source: PubMed Central journal article supplement (PMC3976812; doi:10.1155/2014/248505), 2014-03-17
Supplement: 248505.f1.pdf [file 248505.f1.pdf]

**Import Primary Images**

From Local Drive

From DICOM server

**Import Fusion Images**

Load Fusion Image

From DICOM server

**Segmentation**

SUV:  Clusters:

SUV region growing

Fuzzy C-mean

**VOI**

Load .voi Load DICOM-RT

1

Do not change location by VOI

Save this VOI

**Apply analysis**

On current VOI

On all VOIs

Generate Parametric Image

CGITA website

Program settings

Save current subject

Exit

The interface displays three CT scan views: an axial view at the top left, a coronal view at the top right, and a sagittal view at the bottom right. A green dashed outline highlights a region of interest in the skull in all views. The axial view is labeled 'R' on the left and 'L' on the right. The coronal view is labeled 'R' on the left and 'L' on the right. The sagittal view is labeled 'R' on the left and 'L' on the right. A 'Display control' panel is located at the bottom center, containing the following controls:

- Primary image min:  max:  Colormap:
- Fusion image min:  max:  Colormap:
- Fusion factor:
- Snap Screen button

Supplemental Figure 1. Screen capture of CGITA, in which a set of patient's CT images are loaded and used for computation of heterogeneity indices.
