# Supplementary material for: Development and Evaluation of an Open-Source Software Package “CGITA” for Quantifying Tumor Heterogeneity with Molecular Images
Source: PubMed Central journal article supplement (PMC3976812; doi:10.1155/2014/248505), 2014-03-17
Supplement: 248505.f2.pdf [file 248505.f2.pdf]

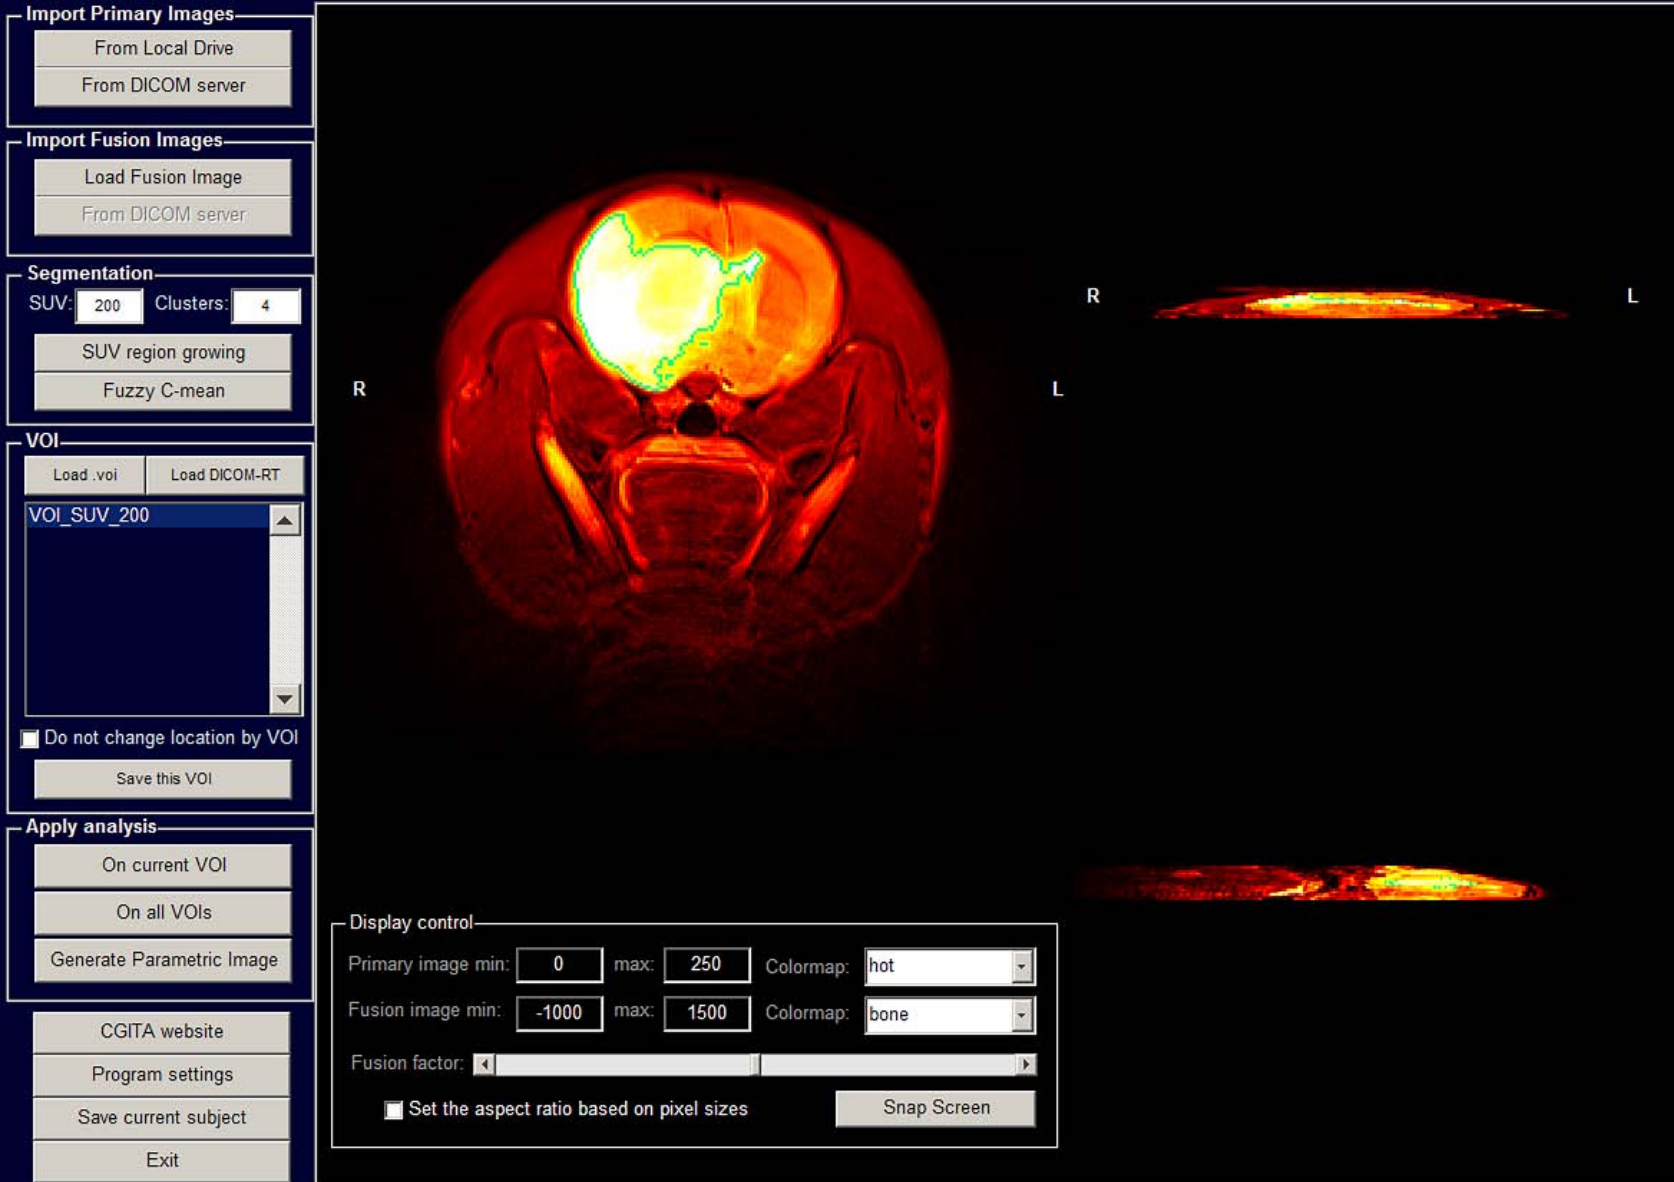

**Chang-Gung Image Texture Analysis (CGITA) Toolbox**

Originated from Molecular Imaging Center, Chang-Gung Memorial Hospital, Taiwan

Supplemental Figure 2. Screen capture of CGITA, in which a set of animal MRI brain images are loaded and used for computation of heterogeneity indices.
